# Supplementary material
Source: Elsevier journal article supplement (https://www.sciencedirect.com/science/article/pii/S1579212915003535)
Supplement: mmc1 [file S1579212915003535:mmc1.pdf]

## Anexo: Preguntas y posibles respuestas del cuestionario del paciente.

1) *Pregunta:* ¿Recuerda algo de la ecobroncoscopia?

*Posibles respuestas:* Mucho-Bastante-Algo-Poco-Muy poco

2) *Pregunta:* ¿Sintió dolor durante la exploración?

*Posibles respuestas:* Mucho-Bastante-Algo-Poco-Muy poco

3) *Pregunta:* ¿Tuvo tos durante la exploración?

*Posibles respuestas:* Mucho-Bastante-Algo-Poco-Muy poco

4) *Pregunta:* ¿Tuvo sensación de falta de aire durante la exploración?

*Posibles respuestas:* Mucho-Bastante-Algo-Poco-Muy poco

5) *Pregunta:* ¿Le ha resultado larga la exploración?

*Posibles respuestas:* Mucho-Bastante-Algo-Poco-Muy poco

6) *Pregunta:* ¿Sentía miedo antes de la exploración?

*Posibles respuestas:* Mucho-Bastante-Algo-Poco-Muy poco

7) *Pregunta:* ¿Sentía nerviosismo antes de la exploración?

*Posibles respuestas:* Mucho-Bastante-Algo-Poco-Muy poco

8) *Pregunta:* ¿Sentiría miedo si tuviera que repetirse la exploración?

*Posibles respuestas:* Mucho-Bastante-Algo-Poco-Muy poco

9) *Pregunta:* ¿Se encontraría nervioso si tuviera que repetirse la exploración?

*Posibles respuestas:* Mucho-Bastante-Algo-Poco-Muy poco

10) *Pregunta:* ¿Se sentiría indiferente si tuviera que repetirse la exploración?

*Posibles respuestas:* Mucho-Bastante-Algo-Poco-Muy poco

11) *Pregunta:* En general la exploración ¿le ha resultado angustiosa?

*Posibles respuestas:* Mucho-Bastante-Algo-Poco-Muy poco

12) *Pregunta:* En general la exploración ¿le ha resultado incómoda?

*Posibles respuestas:* Mucho-Bastante-Algo-Poco-Muy poco

13) *Pregunta:* ¿Cuál fue para usted el peor momento?

*Posibles respuestas: El momento de la anestesia-La entrada del ecobroncoscopio por boca- El principio de la exploración- El final de la exploración- No hay ningún momento malo-Todo fue malo*

14) *Pregunta: ¿Se repetiría la ecobroncoscopia si fuera necesario?*

*Posibles respuestas: No-Probablemente no-Probablemente sí-Sí*
